# Supplementary material for: Cooking and sensorial quality, nutritional composition and functional properties of cold-extruded rice/white bean gluten-free fettuccine fortified with whole carob fruit flour
Source: Royal Society of Chemistry journal article supplement (doi:10.1039/d0fo01470b), 2020-01-01

Arribas et al.,

**Figure S1.** The uncooked experimental rice/bean fettuccine without (20.0, 40.0, 60.0, 80.0, bean 100%, rice 100%) and with (20.10, 40.10, 60.10 and 80.10) whole carob fruit and the commercial rice pasta (control).

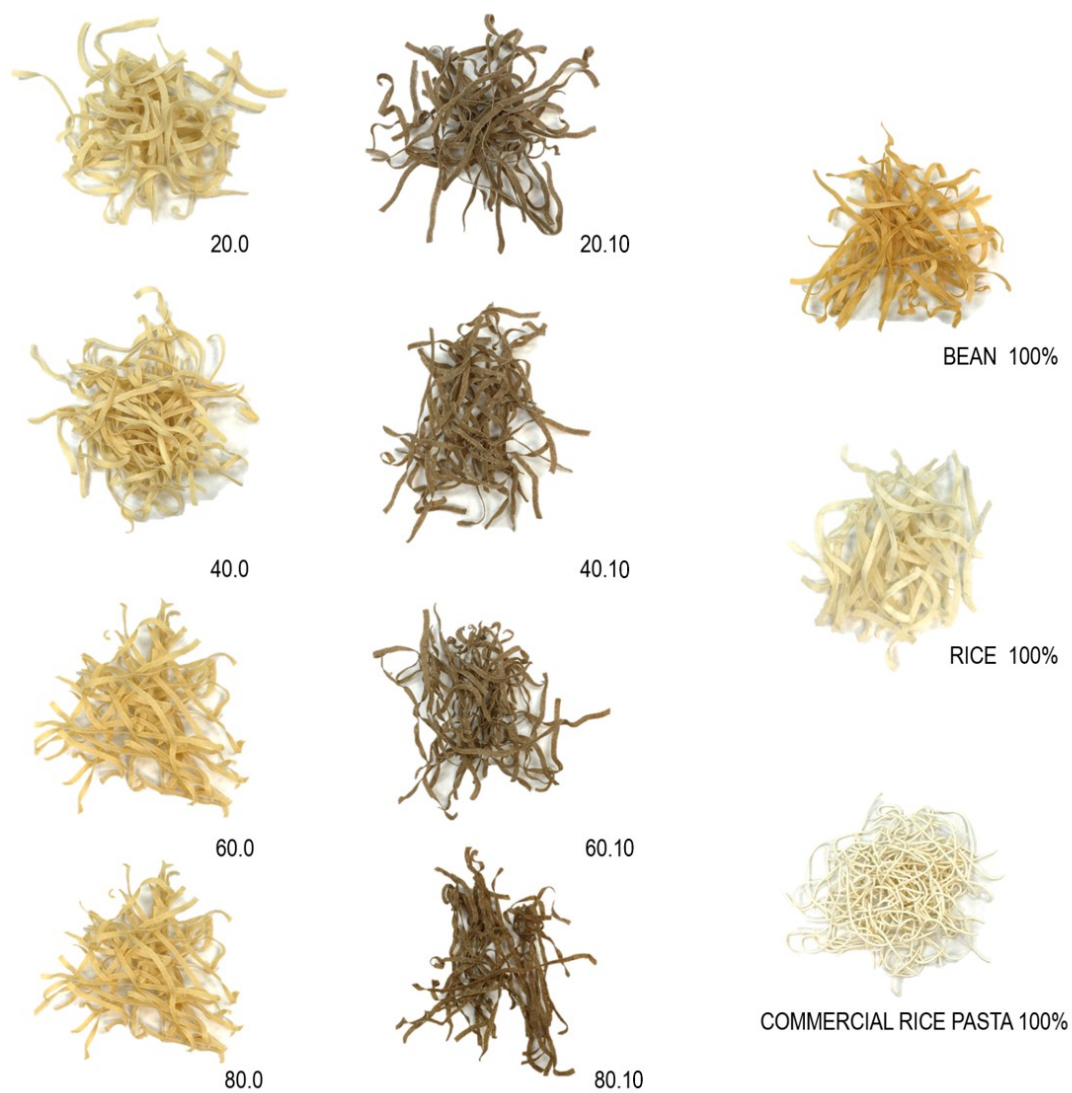

Supplement: d0fo01470b1.pdf [file d0fo01470b1.pdf]
