# Supplementary material for: Cooking and sensorial quality, nutritional composition and functional properties of cold-extruded rice/white bean gluten-free fettuccine fortified with whole carob fruit flour
Source: Royal Society of Chemistry journal article supplement (doi:10.1039/d0fo01470b), 2020-01-01
Supplement: d0fo01470b3.pdf [file d0fo01470b3.pdf]

Arribas et al.,

**Table S1.** Proximate composition (g/100g d.m.), soluble protein (g/100g d.m.), percentage of total starch, resistant starch, amylose and amylopectin, content of total (TDF), insoluble (IDF) and soluble (SDF) dietary fibre (g/100g d.m.) on raw materials used in the elaboration of the experimental fettuccine.

| <b>Compound</b>            | <b>Raw Rice</b> | <b>Raw Bean</b> | <b>Raw Carob</b> |
|----------------------------|-----------------|-----------------|------------------|
| <b>Dry matter</b>          | 86.76 ± 0.04    | 91.39 ± 0.11    | 89.93 ± 0.03     |
| <b>Ash</b>                 | 0.48 ± 0.001    | 4.28 ± 0.001    | 2.81 ± 0.001     |
| <b>Total protein</b>       | 6.88 ± 0.09     | 25.38 ± 0.23    | 4.95 ± 0.08      |
| <b>Soluble protein</b>     | 0.65 ± 0.001    | 10.08 ± 0.92    | 0.10 ± 0.001     |
| <b>Fat</b>                 | 0.83 ± 0.01     | 0.94 ± 0.08     | 0.39 ± 0.03      |
| <b>Total Carbohydrates</b> | 91.81 ± 0.12    | 69.40 ± 0.05    | 91.85 ± 0.65     |
| <b>Total Starch</b>        | 76.24 ± 1.38    | 26.27 ± 0.55    | n.d.             |
| <b>Resistant Starch</b>    | n.d             | 23.31 ± 0.52    | n.d.             |
| <b>Amylose</b>             | 27.64 ± 0.18    | 30.38 ± 1.26    | n.d.             |
| <b>Amylopectin</b>         | 72.36 ± 0.18    | 69.92 ± 1.26    | n.d.             |
| <b>FDT</b>                 | 0.77 ± 0.25     | 21.60 ± 1.90    | 36.38 ± 4.63     |
| <b>IDF</b>                 | 0.65 ± 0.93     | 20.79 ± 1.75    | 32.84 ± 3.45     |
| <b>SDF</b>                 | 0.12 ± 0.001    | 0.81 ± 0.04     | 3.54 ± 1.18      |

Vales are mean ± standard deviation (n=4). n.d.: not detected
