# Supplementary material for: Cooking and sensorial quality, nutritional composition and functional properties of cold-extruded rice/white bean gluten-free fettuccine fortified with whole carob fruit flour
Source: Royal Society of Chemistry journal article supplement (doi:10.1039/d0fo01470b), 2020-01-01
Supplement: d0fo01470b4.pdf [file d0fo01470b4.pdf]

**Arribas et al.**

**Table S4.** Macronutrients (g) and energy (kcal) supplied by one-serving (60g d.m.) of uncooked (P-) fortified rice-pasta or commercial rice pasta as control, and the coverage of daily recommended intake (DRI) in percentage according to the USDA recommendations\*.

|                                 | <b>Protein<br/>(g)</b> | <b>Fat<br/>(g)</b> | <b>Dietary fibre<br/>(g)</b> | <b>Carbohydrates<br/>(g)</b> | <b>Energy<br/>(kcal)</b> |
|---------------------------------|------------------------|--------------------|------------------------------|------------------------------|--------------------------|
| <i>DRI</i> <sup>a</sup>         | 51                     | 60                 | 30                           | 130                          | 2000                     |
| <b>P-20.0</b>                   |                        |                    |                              |                              |                          |
| Amount supplied by one serving  | 7.33                   | 0.00               | 5.31                         | 45.29                        | 221.08                   |
| % DRI                           | 14.36                  | 0.00               | 17.70                        | 34.84                        | 11.05                    |
| <b>P-20.10</b>                  |                        |                    |                              |                              |                          |
| Amount supplied by one serving  | 7.59                   | 0.00               | 7.31                         | 42.86                        | 216.44                   |
| %DRI                            | 14.88                  | 0.00               | 24.38                        | 32.97                        | 10.82                    |
| <b>P-40.0</b>                   |                        |                    |                              |                              |                          |
| Amount supplied by one serving  | 9.59                   | 1.28               | 7.94                         | 38.66                        | 220.44                   |
| %DRI                            | 18.80                  | 2.14               | 26.46                        | 29.74                        | 11.02                    |
| <b>P-40.10</b>                  |                        |                    |                              |                              |                          |
| Amount supplied by one serving  | 9.41                   | 1.32               | 8.17                         | 38.47                        | 219.77                   |
| %DRI                            | 18.46                  | 2.20               | 27.24                        | 29.59                        | 10.99                    |
| <b>P-60.0</b>                   |                        |                    |                              |                              |                          |
| Amount supplied by one serving  | 11.29                  | 1.30               | 9.76                         | 34.70                        | 215.17                   |
| %DRI                            | 22.14                  | 2.16               | 32.54                        | 26.70                        | 10.76                    |
| <b>P-60.10</b>                  |                        |                    |                              |                              |                          |
| Amount supplied by one serving  | 11.30                  | 1.27               | 13.98                        | 30.37                        | 206.03                   |
| %DRI                            | 22.16                  | 2.11               | 46.60                        | 23.36                        | 10.30                    |
| <b>P-80.0</b>                   |                        |                    |                              |                              |                          |
| Amount supplied by one serving  | 12.76                  | 1.27               | 13.85                        | 28.81                        | 205.35                   |
| %DRI                            | 25.01                  | 2.11               | 46.18                        | 22.16                        | 10.27                    |
| <b>P-80.10</b>                  |                        |                    |                              |                              |                          |
| Amount supplied by one serving  | 12.56                  | 1.31               | 17.15                        | 25.45                        | 198.12                   |
| %DRI                            | 24.64                  | 2.18               | 57.18                        | 19.57                        | 9.91                     |
| <b>P-Bean</b>                   |                        |                    |                              |                              |                          |
| Amount supplied by one serving  | 14.41                  | 1.27               | 17.96                        | 22.77                        | 196.01                   |
| %DRI                            | 28.25                  | 2.11               | 59.86                        | 17.52                        | 9.80                     |
| <b>P-Rice</b>                   |                        |                    |                              |                              |                          |
| Amount supplied by one serving  | 5.53                   | 0.00               | 2.08                         | 51.36                        | 231.72                   |
| %DRI                            | 10.85                  | 0.00               | 6.92                         | 39.51                        | 11.59                    |
| <b>P- Commercial rice pasta</b> |                        |                    |                              |                              |                          |
| Amount supplied by one serving  | 4.21                   | 3.16               | 4.12                         | 46.29                        | 238.64                   |
| %DRI                            | 8.26                   | 5.26               | 13.72                        | 35.61                        | 11.93                    |

\*USDA Food Guide (Dietary Guidelines for Americans, 2010) for a 2000 kcal (8368 kJ) diet.

<sup>a</sup>Mean values for the amounts recommended for men and women were used.

**Table S5.** Macronutrients (g) and energy (kcal) supplied by one-serving (60g d.m.) of cooked (PC-) fortified rice-pasta or commercial rice pasta as control, and the coverage of daily recommended intake (DRI) in percentage according to the USDA recommendations\*.

|                                  | <b>Protein<br/>(g)</b> | <b>Fat<br/>(g)</b> | <b>Dietary fibre<br/>(g)</b> | <b>Carbohydrates<br/>(g)</b> | <b>Energy<br/>(kcal)</b> |
|----------------------------------|------------------------|--------------------|------------------------------|------------------------------|--------------------------|
| <i>DRI</i> <sup>a</sup>          | 51                     | 60                 | 30                           | 130                          | 2000                     |
| <b>PC-20.0</b>                   |                        |                    |                              |                              |                          |
| Amount supplied by one serving   | 7.82                   | 0.00               | 5.56                         | 18.89                        | 117.94                   |
| %DRI                             | 15.33                  | 0.00               | 18.52                        | 14.53                        | 5.90                     |
| <b>PC-20.10</b>                  |                        |                    |                              |                              |                          |
| Amount supplied by one serving   | 7.64                   | 0.00               | 8.73                         | 12.69                        | 98.80                    |
| %DRI                             | 14.99                  | 0.00               | 29.10                        | 9.76                         | 4.94                     |
| <b>PC-40.0</b>                   |                        |                    |                              |                              |                          |
| Amount supplied by one serving   | 9.29                   | 1.23               | 9.11                         | 12.89                        | 118.03                   |
| %DRI                             | 18.21                  | 2.05               | 30.38                        | 9.92                         | 5.90                     |
| <b>PC-40.10</b>                  |                        |                    |                              |                              |                          |
| Amount supplied by one serving   | 9.60                   | 1.20               | 10.87                        | 12.21                        | 119.78                   |
| %DRI                             | 18.82                  | 2.00               | 36.24                        | 9.39                         | 5.99                     |
| <b>PC-60.0</b>                   |                        |                    |                              |                              |                          |
| Amount supplied by one serving   | 11.53                  | 1.26               | 12.81                        | 9.05                         | 119.26                   |
| %DRI                             | 22.60                  | 2.10               | 42.70                        | 6.96                         | 5.96                     |
| <b>PC-60.10</b>                  |                        |                    |                              |                              |                          |
| Amount supplied by one serving   | 11.24                  | 1.17               | 14.07                        | 7.81                         | 114.87                   |
| %DRI                             | 22.05                  | 1.95               | 46.90                        | 6.00                         | 5.74                     |
| <b>PC-80.0</b>                   |                        |                    |                              |                              |                          |
| Amount supplied by one serving   | 13.46                  | 1.20               | 14.38                        | 10.68                        | 136.12                   |
| %DRI                             | 26.39                  | 2.00               | 47.94                        | 8.22                         | 6.81                     |
| <b>PC-80.10</b>                  |                        |                    |                              |                              |                          |
| Amount supplied by one serving   | 13.55                  | 1.20               | 17.45                        | 4.43                         | 117.60                   |
| %DRI                             | 26.56                  | 2.00               | 58.16                        | 3.41                         | 5.88                     |
| <b>PC-Bean</b>                   |                        |                    |                              |                              |                          |
| Amount supplied by one serving   | 15.10                  | 1.20               | 18.95                        | 2.83                         | 120.18                   |
| %DRI                             | 29.60                  | 2.00               | 63.16                        | 2.17                         | 6.02                     |
| <b>PC-Rice</b>                   |                        |                    |                              |                              |                          |
| Amount supplied by one serving   | 5.92                   | 0.00               | 2.54                         | 16.22                        | 93.67                    |
| %DRI                             | 11.61                  | 0.00               | 8.48                         | 12.48                        | 4.68                     |
| <b>PC- Commercial rice pasta</b> |                        |                    |                              |                              |                          |
| Amount supplied by one serving   | 3.92                   | 3.15               | 5.17                         | 18.95                        | 130.21                   |
| %DRI                             | 7.69                   | 5.25               | 17.24                        | 14.58                        | 6.51                     |

\*USDA Food Guide (Dietary Guidelines for Americans, 2010) for a 2000 kcal (8368 kJ) diet.

<sup>a</sup>Mean values for the amounts recommended for men and women were used.
