# Supplementary material for: Cooking and sensorial quality, nutritional composition and functional properties of cold-extruded rice/white bean gluten-free fettuccine fortified with whole carob fruit flour
Source: Royal Society of Chemistry journal article supplement (doi:10.1039/d0fo01470b), 2020-01-01
Supplement: d0fo01470b5.pdf [file d0fo01470b5.pdf]

Arribas et al.,

**Table S2.** Essential amino acid contents (mg/g protein) of raw materials (bean, carob fruit and rice), casein and uncooked GF fettuccine and suggested amino

| Amino acid               | Uncooked GF fettuccine |                |       |         |       |        |       |        |       |        |       |        | Amino acid requirements<br>for adults |
|--------------------------|------------------------|----------------|-------|---------|-------|--------|-------|--------|-------|--------|-------|--------|---------------------------------------|
|                          | Bean                   | Carob<br>fruit | Rice  | Caseine | P20.0 | P20.10 | P40.0 | P40.10 | P60.0 | P60.10 | P80.0 | P80.10 |                                       |
| Histidine                | 28,85                  | 21,64          | 23,81 | 16,5    | 23,6  | 23,5   | 24,9  | 24,9   | 26,2  | 26,2   | 27,5  | 27,5   | 17                                    |
| Threonine                | 34,71                  | 30,61          | 28,78 | 39,6    | 30,0  | 30,1   | 31,1  | 31,3   | 32,3  | 32,5   | 33,5  | 33,7   | 13                                    |
| Valine                   | 50,33                  | 52,73          | 53,75 | 53,3    | 53,1  | 53,0   | 52,4  | 52,3   | 51,7  | 51,6   | 51,0  | 50,9   | 18,0                                  |
| Methionine + cysteine    | 18,12                  | 34,34          | 37,79 | 27,9    | 33,9  | 33,5   | 29,9  | 29,6   | 26,0  | 25,6   | 22,1  | 21,7   | 24                                    |
| Phenilalanine + tyrosine | 83,14                  | 46,46          | 85,76 | 95,9    | 85,2  | 81,3   | 84,7  | 80,8   | 84,2  | 80,3   | 83,7  | 79,7   | 25                                    |
| Isoleucine               | 42,91                  | 28,84          | 35,88 | 40,9    | 37,3  | 36,6   | 38,7  | 38,0   | 40,1  | 39,4   | 41,5  | 40,8   | 18                                    |
| Leucine                  | 74,56                  | 50,78          | 72,09 | 74,9    | 72,6  | 70,5   | 73,1  | 70,9   | 73,6  | 71,4   | 74,1  | 71,9   | 25                                    |
| Lysine                   | 65,44                  | 35,97          | 30,49 | 97,9    | 37,5  | 38,0   | 44,5  | 45,0   | 51,5  | 52,0   | 58,4  | 59,0   | 22                                    |

acid requirements for human according to the FAO<sup>19</sup>.

**Table S3.** Amino acid scores for raw materials (bean, carob fruit and rice), casein and uncooked GF fettuccine based on amino acid requirements for human according to the FAO<sup>19</sup>.

| Amino acid               | Uncooked GF fettuccine |                |            |            |                |            |            |            |            |            |            |            |
|--------------------------|------------------------|----------------|------------|------------|----------------|------------|------------|------------|------------|------------|------------|------------|
|                          | Bean                   | Carob<br>fruit | Rice       | Caseine    | P20.0          | P20.10     | P40.0      | P40.10     | P60.0      | P60.10     | P80.0      | P80.10     |
| Histidine                | 1,7                    | <b>1,3</b>     | <b>1,4</b> | <b>1,0</b> | <b>1,4</b>     | <b>1,4</b> | 1,5        | 1,5        | 1,5        | 1,5        | 1,6        | 1,6        |
| Threonine                | 2,7                    | 2,4            | 2,2        | 3,0        | 2,3            | 2,3        | 2,4        | 2,4        | 2,5        | 2,5        | 2,6        | 2,6        |
| Valine                   | 2,8                    | 2,9            | 3,0        | 3,0        | 2,9            | 2,9        | 2,9        | 2,9        | 2,9        | 2,9        | 2,8        | 2,8        |
| Methionine + cysteine    | <b>0,8<sup>a</sup></b> | 1,4            | 1,6        | 1,2        | <b>1,4</b>     | <b>1,4</b> | <b>1,2</b> | <b>1,2</b> | <b>1,1</b> | <b>1,1</b> | <b>0,9</b> | <b>0,9</b> |
| Phenilalanine + tyrosine | 3,3                    | 1,9            | 3,4        | 3,8        | 3,4            | 3,3        | 3,4        | 3,2        | 3,4        | 3,2        | 3,3        | 3,2        |
| Isoleucine               | 2,4                    | 1,6            | 2,0        | 2,3        | 2,1            | 2,0        | 2,1        | 2,1        | 2,2        | 2,2        | 2,3        | 2,3        |
| Leucine                  | 3,0                    | 2,0            | 2,9        | 3,0        | 2,9            | 2,8        | 2,9        | 2,8        | 2,9        | 2,9        | 3,0        | 2,9        |
| Lysine                   | 3,0                    | 1,6            | <b>1,4</b> | 4,5        | 1,7            | 1,7        | 2,0        | 2,0        | 2,3        | 2,4        | 2,7        | 2,7        |
| Chemical score           | <b>0,8</b>             | <b>1,3</b>     | <b>1,4</b> | <b>1,0</b> | <b>1,4</b>     | <b>1,4</b> | <b>1,2</b> | <b>1,2</b> | <b>1,1</b> | <b>1,1</b> | <b>0,9</b> | <b>0,9</b> |
| Limiting amino acid(s)   | Met + Cys              | His            | His, Lys   | His        | Met + Cys, His |            |            | Met + Cys  |            |            |            |            |

<sup>a</sup> data in bold type denote the chemical scores.
